# Supplementary material for: Feed Regime Slightly Modifies the Bacterial but Not the Fungal Communities in the Intestinal Mucosal Microbiota of Cobia Fish (Rachycentron canadum)
Source: MDPI journal article supplement (doi:10.3390/microorganisms11092315), 2023-09-14
Supplement: s1 [file s1]

## SUPPLEMENTARY TABLES:

**Supplementary Table S1.** Fish diet compositions.

| Diet        | FF (Formulated feed)              | FFP (Frozen Fish Pieces)                                                                       |
|-------------|-----------------------------------|------------------------------------------------------------------------------------------------|
| Description | Commercial diet, Skretting-GISIS® | mixture of local fish: <i>Auxis</i> sp., <i>Scomber japonicus</i> , and <i>Opisthonema</i> sp. |
| Diameter    | 7 mm                              | -                                                                                              |
| Protein     | 40.0%                             | 18.1%                                                                                          |
| Lipids      | 13.0%                             | 5.8%                                                                                           |
| Moisture    | 11.0%                             | 73.5%                                                                                          |
| Fiber       | 3.0%                              | 0.0%                                                                                           |
| Reference   | Skretting, 2023                   | Apolinario Castillo, 2017                                                                      |

**Supplementary Table S2.** Fish sampled for the microbiota study.

|                       | Fish information |      |    |     |            | Information of intestinal samples |                           | 16S rARN (V3-V4) sequencing      |                        | ITS2 region sequencing           |                        |
|-----------------------|------------------|------|----|-----|------------|-----------------------------------|---------------------------|----------------------------------|------------------------|----------------------------------|------------------------|
| Sampling date         | Feed             | Tank | N° | Sex | Weight (g) | Sample code                       | DNA concentration (ng/μL) | QC and amplification in Novogene | Analyzed in this study | QC and amplification in Novogene | Analyzed in this study |
| 17/2/2021             | FF               | B1   | 1  | IND | 236.20     | C7                                | 172.9                     | pass                             | yes                    | pass                             | yes                    |
|                       |                  |      | 2  | IND | 447.20     | C11                               | 89.5                      | pass                             | yes                    | pass                             | No, <400 clean reads   |
|                       |                  |      | 3  | IND | 418.60     | C9                                | 67.7                      | pass                             | yes                    | pass                             | yes                    |
|                       |                  |      | 4  | IND | 415.60     | C13                               | 23.1                      | pass                             | yes                    | pass                             | yes                    |
|                       |                  | B2   | 5  | IND | 250.60     | C10                               | 70                        | pass                             | yes                    | pass                             | yes                    |
|                       |                  |      | 6  | IND | 374.80     | C12                               | 28.5                      | pass                             | yes                    | pass                             | yes                    |
|                       |                  |      | 7  | IND | 448.40     | C8                                | 210.4                     | pass                             | yes                    | pass                             | yes                    |
|                       | FFP              | B3   | 8  | IND | 447.20     | C15                               | 80.3                      | pass                             | yes                    | pass                             | No, <400 clean reads   |
|                       |                  |      | 9  | IND | 463.60     | C16                               | 152.9                     | pass                             | No, <400 clean reads   | pass                             | yes                    |
|                       |                  |      | 10 | IND | 497.70     | C17                               | 145.7                     | pass                             | yes                    | fail                             | no                     |
|                       |                  |      | 11 | IND | 497.60     | C18                               | 90.9                      | pass                             | yes                    | pass                             | yes                    |
|                       |                  |      | 12 | IND | 502.80     | C19                               | 20.7                      | pass                             | yes                    | fail                             | no                     |
|                       |                  | B4   | 13 | F   | 5200.00    | C33                               | 102.1                     | pass                             | yes                    | pass                             | yes                    |
| 19/2/2021             |                  |      | 14 | M   | 4780.00    | C35                               | 329.2                     | pass                             | yes                    | pass                             | yes                    |
| 26/2/2021             |                  |      | 15 | M   | 5140.00    | C39                               | 167.4                     | pass                             | yes                    | pass                             | yes                    |
|                       |                  |      | 16 | M   | 5360.00    | C41                               | 241.7                     | pass                             | yes                    | pass                             | yes                    |
| Total sample analyzed |                  |      |    |     |            |                                   |                           |                                  | 15                     |                                  | 12                     |

**Feed:** FF, formulated feed; and FFP, frozen fish pieces. **Sex:** IND, indeterminate; F, female; and M, male. **QC:** quality control.

**Supplementary Table S3.** Bacterial counts and relative abundance. Phyla included in this table had a prevalence and detection threshold greater than 90% and 0.05%, respectively. Genera included in this table had a prevalence and detection threshold greater than 95% and 0.05%, respectively.

|        |                                    | FF GROUP |       |       |       |       |       |       |        |                      | FFP GROUP |       |       |       |       |       |       |       |        |                      | TOTAL        |                      |
|--------|------------------------------------|----------|-------|-------|-------|-------|-------|-------|--------|----------------------|-----------|-------|-------|-------|-------|-------|-------|-------|--------|----------------------|--------------|----------------------|
| Taxa   | Sample                             | C10      | C11   | C12   | C13   | C7    | C8    | C9    | Counts | Relative abundance % | C15       | C17   | C18   | C19   | C33   | C35   | C39   | C41   | Counts | Relative abundance % | Total counts | Relative abundance % |
| Phylum | Proteobacteria                     | 50364    | 50441 | 50541 | 49715 | 51583 | 51519 | 50957 | 355120 | <b>96,28</b>         | 52277     | 51322 | 51281 | 51371 | 48705 | 50666 | 50638 | 50859 | 407119 | <b>96,58</b>         | 762239       | <b>96,44</b>         |
|        | Firmicutes                         | 905      | 542   | 586   | 1371  | 443   | 510   | 523   | 4880   | <b>1,32</b>          | 159       | 449   | 289   | 369   | 2982  | 443   | 207   | 303   | 5201   | <b>1,23</b>          | 10081        | <b>1,28</b>          |
|        | Actinobacteriota                   | 679      | 817   | 689   | 590   | 150   | 113   | 442   | 3480   | <b>0,94</b>          | 117       | 470   | 615   | 413   | 365   | 655   | 880   | 636   | 4151   | <b>0,98</b>          | 7631         | <b>0,97</b>          |
|        | Acidobacteriota                    | 165      | 260   | 200   | 120   | 136   | 98    | 119   | 1098   | <b>0,30</b>          | 0         | 83    | 104   | 138   | 176   | 97    | 306   | 110   | 1014   | <b>0,24</b>          | 2112         | <b>0,27</b>          |
|        | Gemmatimonadota                    | 117      | 140   | 127   | 204   | 70    | 54    | 65    | 777    | <b>0,21</b>          | 9         | 47    | 110   | 135   | 89    | 112   | 143   | 201   | 846    | <b>0,20</b>          | 1623         | <b>0,21</b>          |
|        | Myxococcota                        | 119      | 148   | 132   | 242   | 55    | 57    | 101   | 854    | <b>0,23</b>          | 0         | 96    | 81    | 49    | 60    | 99    | 190   | 171   | 746    | <b>0,18</b>          | 1600         | <b>0,20</b>          |
|        | Bacteroidota                       | 136      | 119   | 165   | 196   | 56    | 65    | 88    | 825    | <b>0,22</b>          | 82        | 27    | 40    | 35    | 21    | 11    | 45    | 58    | 319    | <b>0,08</b>          | 1144         | <b>0,14</b>          |
|        | Verrucomicrobiota                  | 115      | 116   | 125   | 94    | 63    | 43    | 26    | 582    | <b>0,16</b>          | 0         | 53    | 59    | 65    | 50    | 47    | 117   | 139   | 530    | <b>0,13</b>          | 1112         | <b>0,14</b>          |
|        | Nitrospirota                       | 33       | 45    | 50    | 39    | 20    | 7     | 26    | 220    | <b>0,06</b>          | 0         | 31    | 4     | 18    | 12    | 13    | 35    | 52    | 165    | <b>0,04</b>          | 385          | <b>0,05</b>          |
|        | Others                             | 0        | 11    | 28    | 3     | 0     | 0     | 42    | 84     | <b>0,02</b>          | 9         | 10    | 0     | 0     | 4     | 85    | 20    | 56    | 184    | <b>0,04</b>          | 268          | <b>0,03</b>          |
|        | Total                              | 52690    | 52690 | 52690 | 52690 | 52690 | 52690 | 52690 | 368830 | <b>100,00</b>        | 52690     | 52690 | 52690 | 52690 | 52690 | 52690 | 52690 | 52690 | 421520 | <b>100,00</b>        | 790350       | <b>100,00</b>        |
| Genus  | <i>Photobacterium</i>              | 43850    | 37839 | 45535 | 47310 | 50000 | 46623 | 48778 | 319935 | <b>86,74</b>         | 48938     | 43367 | 47114 | 48623 | 15551 | 45120 | 42487 | 6799  | 297999 | <b>70,70</b>         | 617934       | <b>78,18</b>         |
|        | <i>Vibrio</i>                      | 1837     | 6911  | 3029  | 797   | 505   | 3024  | 688   | 16791  | <b>4,55</b>          | 1387      | 4719  | 1037  | 1127  | 29193 | 2514  | 4463  | 41143 | 85583  | <b>20,30</b>         | 102374       | <b>12,95</b>         |
|        | <i>Catenococcus</i>                | 2746     | 4308  | 617   | 254   | 462   | 1180  | 820   | 10387  | <b>2,82</b>          | 1314      | 1455  | 625   | 791   | 2929  | 1386  | 2226  | 1407  | 12133  | <b>2,88</b>          | 22520        | <b>2,85</b>          |
|        | <i>Clostridium sensu stricto 1</i> | 36       | 3     | 38    | 665   | 33    | 170   | 23    | 968    | <b>0,26</b>          | 34        | 340   | 180   | 253   | 2901  | 280   | 152   | 212   | 4352   | <b>1,03</b>          | 5320         | <b>0,67</b>          |
|        | <i>Enterovibrio</i>                | 324      | 178   | 212   | 192   | 201   | 210   | 161   | 1478   | <b>0,40</b>          | 144       | 316   | 1702  | 292   | 403   | 464   | 190   | 297   | 3808   | <b>0,90</b>          | 5286         | <b>0,67</b>          |
|        | <i>Gemmatimonas</i>                | 117      | 138   | 127   | 204   | 70    | 54    | 65    | 775    | <b>0,21</b>          | 9         | 47    | 110   | 135   | 89    | 112   | 143   | 201   | 846    | <b>0,20</b>          | 1621         | <b>0,21</b>          |
|        | <i>Faecalibacterium</i>            | 129      | 69    | 145   | 164   | 125   | 99    | 119   | 850    | <b>0,23</b>          | 15        | 22    | 24    | 30    | 10    | 17    | 25    | 20    | 163    | <b>0,04</b>          | 1013         | <b>0,13</b>          |
|        | <i>Cutibacterium</i>               | 16       | 14    | 22    | 45    | 4     | 5     | 10    | 116    | <b>0,03</b>          | 66        | 36    | 54    | 39    | 52    | 70    | 60    | 51    | 428    | <b>0,10</b>          | 544          | <b>0,07</b>          |
|        | Others                             | 51       | 82    | 58    | 47    | 0     | 9     | 54    | 301    | <b>0,08</b>          | 1         | 14    | 45    | 0     | 2     | 66    | 65    | 36    | 229    | <b>0,05</b>          | 530          | <b>0,07</b>          |
|        | Total                              | 52690    | 52690 | 52690 | 52690 | 52690 | 52690 | 52690 | 368830 | <b>100,00</b>        | 52690     | 52690 | 52690 | 52690 | 52690 | 52690 | 52690 | 52690 | 421520 | <b>100,00</b>        | 790350       | <b>100,00</b>        |

**FF group**, fish fed formulated feed, and **FFP group**, fish fed frozen fish pieces.

**Supplementary Table S4.** Fungal counts and relative abundance. All phyla were included in this table. Genera included had a prevalence and detection threshold greater than 70% and 0.5%, respectively.

|        |                         | FF GROUP |      |      |      |      |      |        |                      | FF GROUP |      |      |      |      |      |        |                      | TOTAL        |                      |
|--------|-------------------------|----------|------|------|------|------|------|--------|----------------------|----------|------|------|------|------|------|--------|----------------------|--------------|----------------------|
| Taxa   | Sample                  | C10      | C12  | C13  | C7   | C8   | C9   | Counts | Relative abundance % | C16      | C18  | C33  | C35  | C39  | C41  | Counts | Relative abundance % | Total counts | Relative abundance % |
| Phylum | p__Ascomycota           | 1897     | 1582 | 1743 | 1686 | 1675 | 1749 | 10332  | <b>89,32</b>         | 1588     | 1863 | 1354 | 1667 | 1719 | 1836 | 10027  | <b>86,68</b>         | 20359        | <b>88,00</b>         |
|        | p__Basidiomycota        | 31       | 346  | 185  | 237  | 239  | 149  | 1187   | <b>10,26</b>         | 328      | 58   | 574  | 241  | 178  | 79   | 1458   | <b>12,60</b>         | 2645         | <b>11,43</b>         |
|        | p__Mortierellomycota    | 0        | 0    | 0    | 3    | 0    | 30   | 33     | <b>0,29</b>          | 0        | 0    | 0    | 16   | 10   | 4    | 30     | <b>0,26</b>          | 63           | <b>0,27</b>          |
|        | p__Aphelidiomycota      | 0        | 0    | 0    | 2    | 14   | 0    | 16     | <b>0,14</b>          | 0        | 0    | 0    | 0    | 21   | 9    | 30     | <b>0,26</b>          | 46           | <b>0,20</b>          |
|        | p__Glomeromycota        | 0        | 0    | 0    | 0    | 0    | 0    | 0      | <b>0,00</b>          | 12       | 0    | 0    | 0    | 0    | 0    | 12     | <b>0,10</b>          | 12           | <b>0,05</b>          |
|        | p__Olpidiomycota        | 0        | 0    | 0    | 0    | 0    | 0    | 0      | <b>0,00</b>          | 0        | 0    | 0    | 4    | 0    | 0    | 4      | <b>0,03</b>          | 4            | <b>0,02</b>          |
|        | p__Rozellomycota        | 0        | 0    | 0    | 0    | 0    | 0    | 0      | <b>0,00</b>          | 0        | 7    | 0    | 0    | 0    | 0    | 7      | <b>0,06</b>          | 7            | <b>0,03</b>          |
|        | total                   | 1928     | 1928 | 1928 | 1928 | 1928 | 1928 | 11568  | <b>100,00</b>        | 1928     | 1928 | 1928 | 1928 | 1928 | 1928 | 11568  | <b>100,00</b>        | 23136        | <b>100,00</b>        |
| Genus  | Unknown                 | 200      | 552  | 998  | 1100 | 1031 | 975  | 4856   | <b>41,98</b>         | 1457     | 1470 | 1750 | 811  | 686  | 665  | 6839   | <b>59,12</b>         | 11695        | <b>50,55</b>         |
|        | <i>g__Debaryomyces</i>  | 1420     | 627  | 16   | 77   | 11   | 226  | 2377   | <b>20,55</b>         | 29       | 86   | 9    | 213  | 399  | 29   | 765    | <b>6,61</b>          | 3142         | <b>13,58</b>         |
|        | <i>g__Ascobolus</i>     | 28       | 15   | 244  | 183  | 268  | 105  | 843    | <b>7,29</b>          | 19       | 18   | 1    | 0    | 106  | 59   | 203    | <b>1,75</b>          | 1046         | <b>4,52</b>          |
|        | <i>g__Saccharomyces</i> | 148      | 401  | 0    | 47   | 33   | 119  | 748    | <b>6,47</b>          | 67       | 86   | 12   | 101  | 3    | 96   | 365    | <b>3,16</b>          | 1113         | <b>4,81</b>          |
|        | <i>g__Coprinopsis</i>   | 2        | 19   | 31   | 67   | 124  | 23   | 266    | <b>2,30</b>          | 0        | 6    | 0    | 5    | 26   | 39   | 76     | <b>0,66</b>          | 342          | <b>1,48</b>          |
|        | <i>g__Cladosporium</i>  | 2        | 40   | 54   | 29   | 17   | 0    | 142    | <b>1,23</b>          | 41       | 105  | 29   | 44   | 88   | 12   | 319    | <b>2,76</b>          | 461          | <b>1,99</b>          |
|        | <i>g__Yarrowia</i>      | 33       | 51   | 0    | 42   | 8    | 0    | 134    | <b>1,16</b>          | 6        | 32   | 14   | 64   | 0    | 38   | 154    | <b>1,33</b>          | 288          | <b>1,24</b>          |
|        | <i>g__Apiotrichum</i>   | 2        | 7    | 13   | 40   | 38   | 0    | 100    | <b>0,86</b>          | 15       | 0    | 0    | 18   | 12   | 10   | 55     | <b>0,48</b>          | 155          | <b>0,67</b>          |
|        | <i>g__Malassezia</i>    | 0        | 1    | 22   | 11   | 16   | 0    | 50     | <b>0,43</b>          | 4        | 7    | 25   | 40   | 46   | 4    | 126    | <b>1,09</b>          | 176          | <b>0,76</b>          |
|        | Other                   | 93       | 215  | 550  | 332  | 382  | 480  | 2052   | <b>17,74</b>         | 290      | 118  | 88   | 632  | 562  | 976  | 2666   | <b>23,05</b>         | 4718         | <b>20,39</b>         |
|        | total                   | 1928     | 1928 | 1928 | 1928 | 1928 | 1928 | 11568  | <b>100,00</b>        | 1928     | 1928 | 1928 | 1928 | 1928 | 1928 | 11568  | <b>100,00</b>        | 23136        | <b>100,00</b>        |

**FF group**, fish fed formulated feed, and **FFP group**, fish fed frozen fish pieces.

**SUPPLEMENTARY FIGURES:**

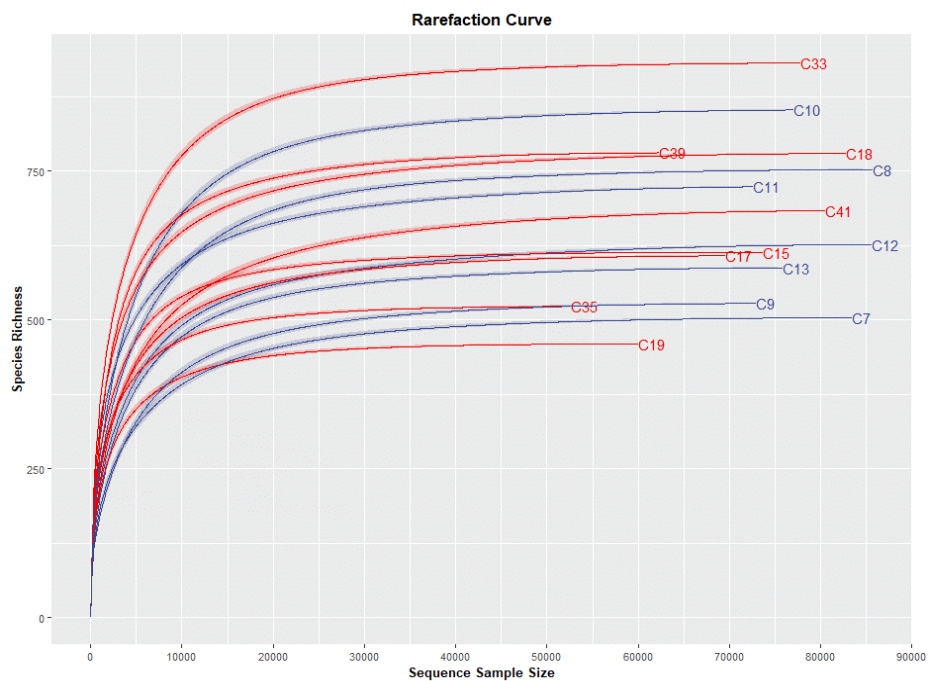

**Supplementary Figure S1.** Rarefaction curves showing the richness of the bacterial communities in the gut of cobia (*Rachycentron canadum*) fed with FF, formulated feed (blue line), and FFP, frozen fish pieces (red line).

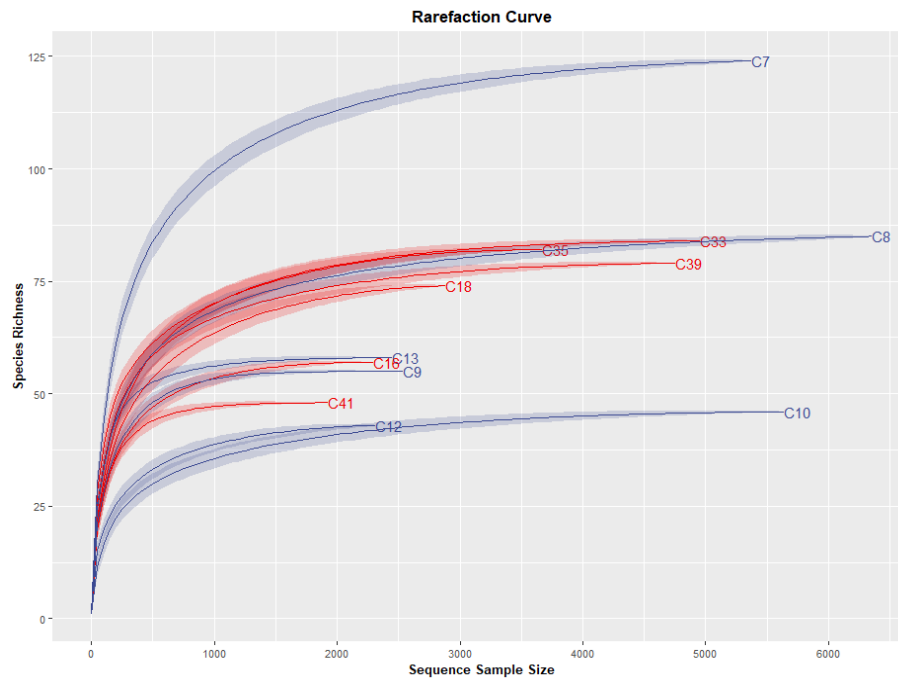

**Supplementary Figure S2.** Rarefaction curve showing the richness of the mycobiota in the gut of cobia (*Rachycentron canadum*) fed with FF, formulated feed (blue line), and FFP, frozen fish pieces (red line).

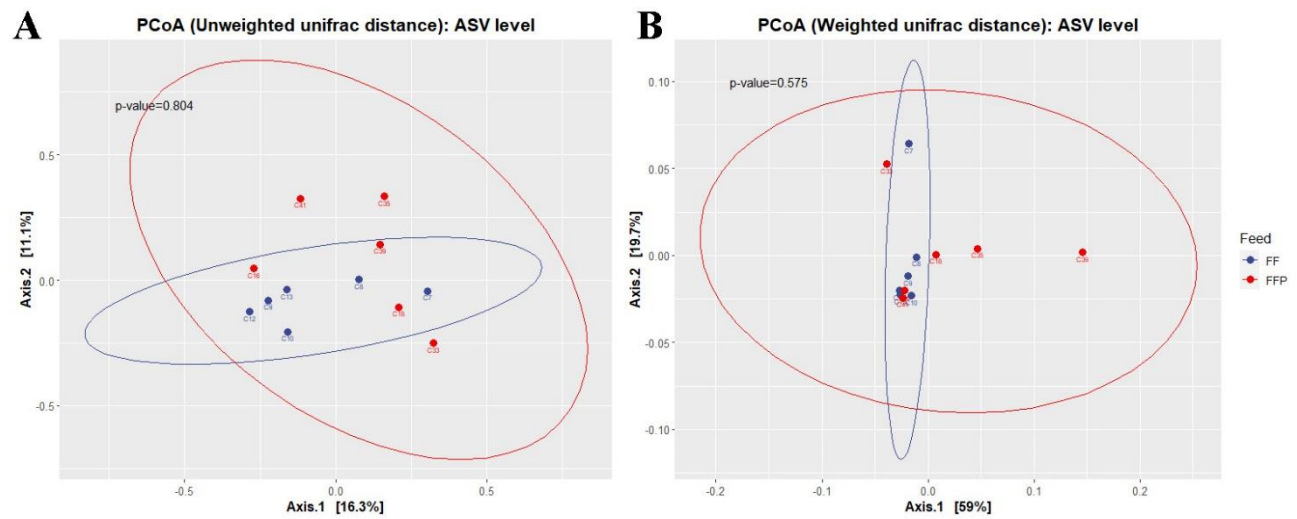

**Supplementary Figure S3.** PCoA analysis of cobia (*Rachycentron canadum*) intestinal mycobiota fed with formulated feed (FF) and frozen fish pieces (FFP) using ASVs. **A)** Unweighted Unifrac distance, non-significant distance between groups ( $p = 0.804$ ), where the principal components explain 14.5 and 12.7% of data variance; and **B)** Weighted Unifrac distance, non-significant distance between groups ( $p = 0.575$ ), where the principal components explain 42.1 and 20.3% of data variance. The ellipses represent 95% confidence level groups for a multivariate normal distribution.

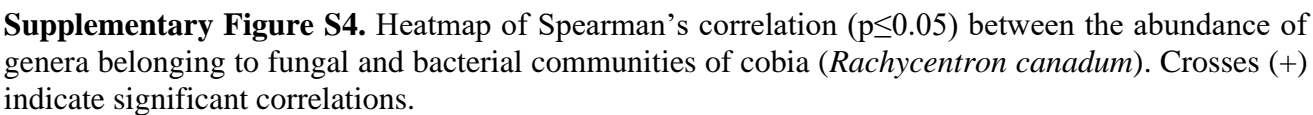

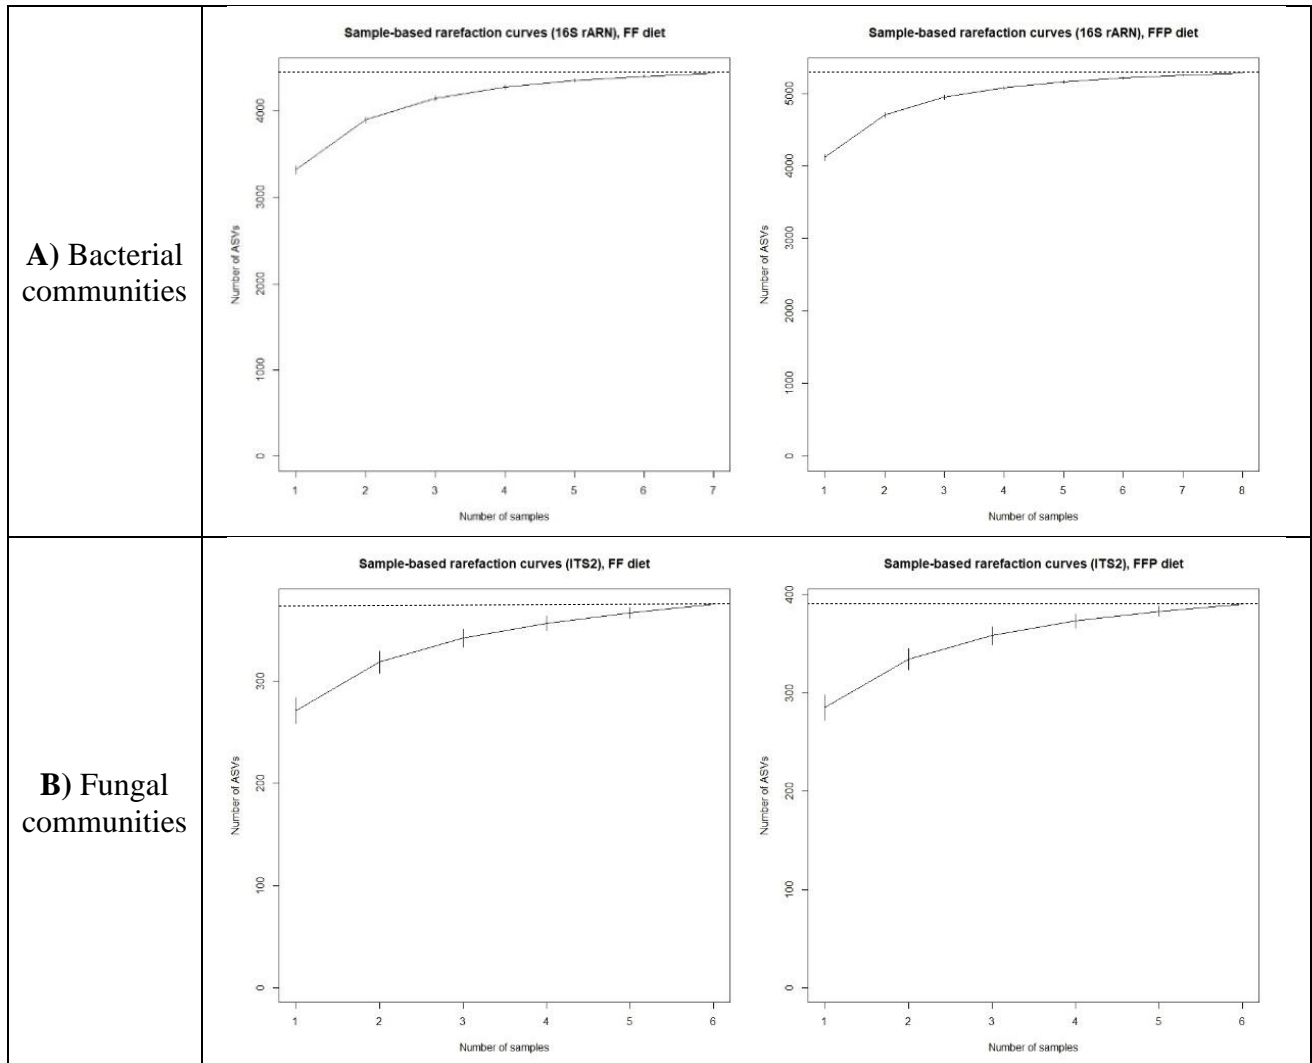

**Supplementary Figure S5.** ASV accumulation curves with sample size per treatment, showing the extent to which, each additional sample increases total number of ASVs detected per treatment for **A)** bacterial and **B)** fungal communities of cobia (*Rachycentron canadum*). Horizontal dotted lines indicate the asymptote of the curve.
